# Supplementary material
Source: PubMed Central journal article supplement (PMC4363403)
Supplement: IAI.02904-14_zii999091155so1.pdf [file IAI.02904-14_zii999091155so1.pdf]

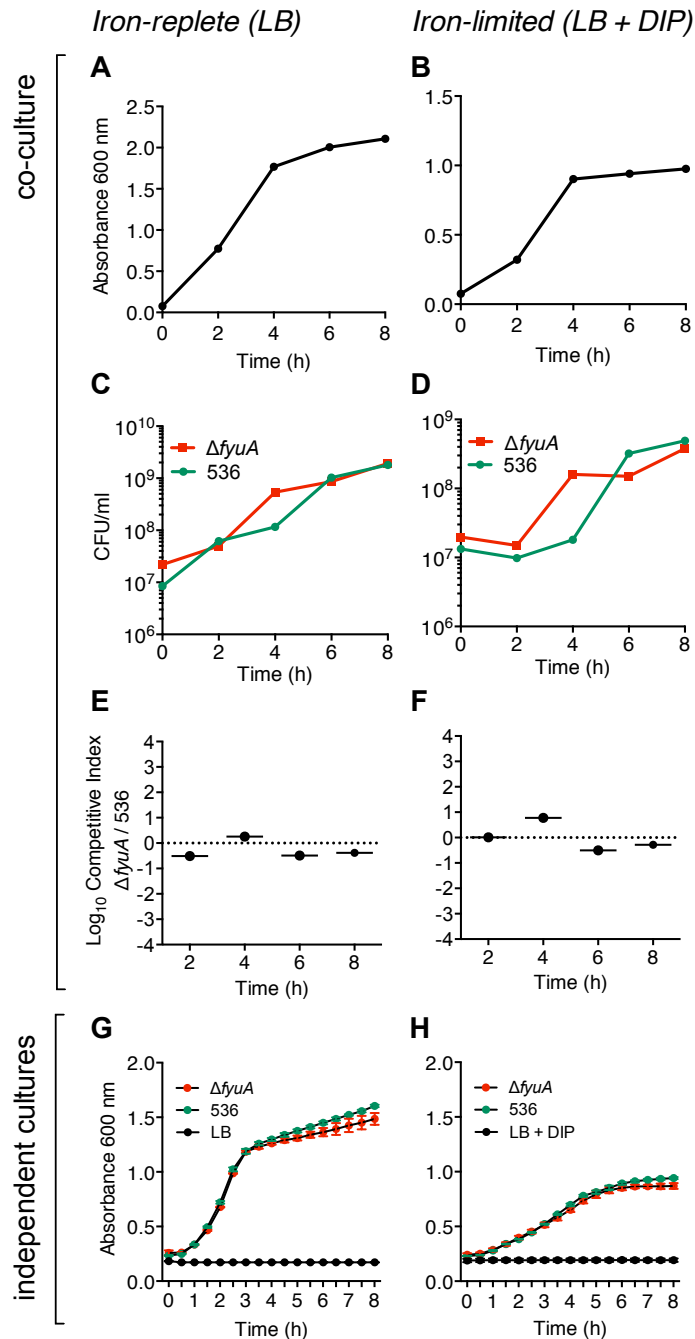

**Supplementary figure 1. Blocking yersiniabactin import *in vitro* does not attenuate *E. coli* fitness.** The *fyuA* mutant and wild type *E. coli* 536 were co-inoculated at a ratio of 1:1 into iron-replete media (LB) and iron-limited media (LB + 200  $\mu$ M DIP) and allowed to incubate at 37°C with aeration for 8 h. Cultures were sampled every 2 h to monitor growth rate by optical density (A, B) and plated on selective media to enumerate colonies of the *fyuA* mutant in comparison to wild type (C, D). A competitive index was calculated for each time point (E, F). Growth rates between strains cultured independently were also compared (G, H).
